# Supplementary material
Source: publisher figshare collection journal article supplement (https://acs.figshare.com/ndownloader/files/17302352)
Supplement: Supplementary file 1 [file 17302352]

# ***Supporting Information:* Elucidating Structure–Spectral Properties Relationships of Negative Thermal Expansion $\text{Zr}_2(\text{WO}_4)(\text{PO}_4)_2$ : A First–Principles Study with Experimental Validation**

Philippe F. Weck<sup>\*,†</sup>, Eunja Kim<sup>‡</sup>, Margaret E. Gordon<sup>†</sup>, Jeffery A. Greathouse<sup>†</sup>, Stephen P. Meserole<sup>†</sup> and Charles R. Bryan<sup>†</sup>

<sup>†</sup> Sandia National Laboratories, Albuquerque, New Mexico 87185, United States

<sup>‡</sup> Department of Physics and Astronomy, University of Nevada Las Vegas, 4505 Maryland Parkway, Las Vegas, Nevada 89124, United States

## **S1. IR- and Raman-Active Vibrational Modes**

### **S1.1. Major IR-Active Vibrational Modes**

IR mode at  $1065\text{ cm}^{-1}$  ( $m$ : medium) [ $B_{2u}$ ;  $\nu_1(\text{PO}_4)$ ]:

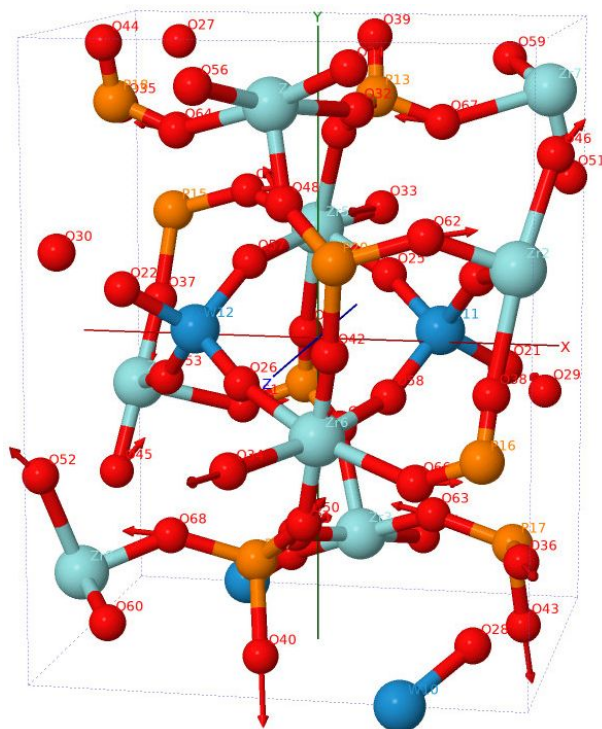

IR mode at  $1007\text{ cm}^{-1}$  (s: strong) [ $B_{2u}$ ;  $\nu_3(\text{PO}_4)$ ]:

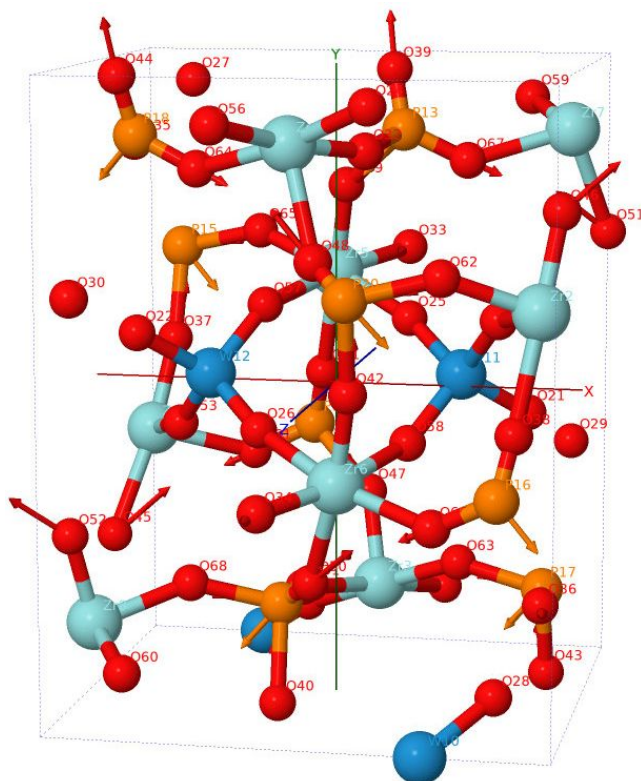

IR mode at  $872\text{ cm}^{-1}$  (s) [ $B_{1u}$ ;  $\nu_3(\text{WO}_4)$ ]:

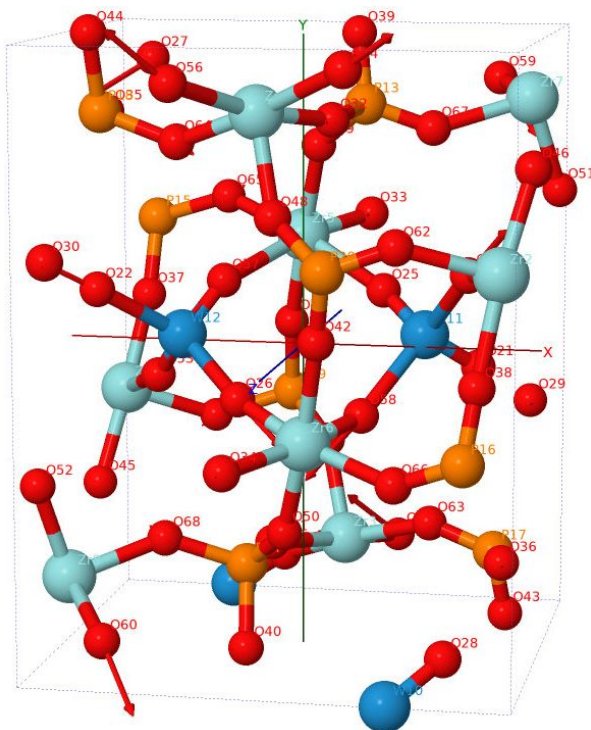

IR mode at  $837\text{ cm}^{-1}$  (s) [ $B_{3u}$ ;  $\nu_3(\text{WO}_4)$ ]:

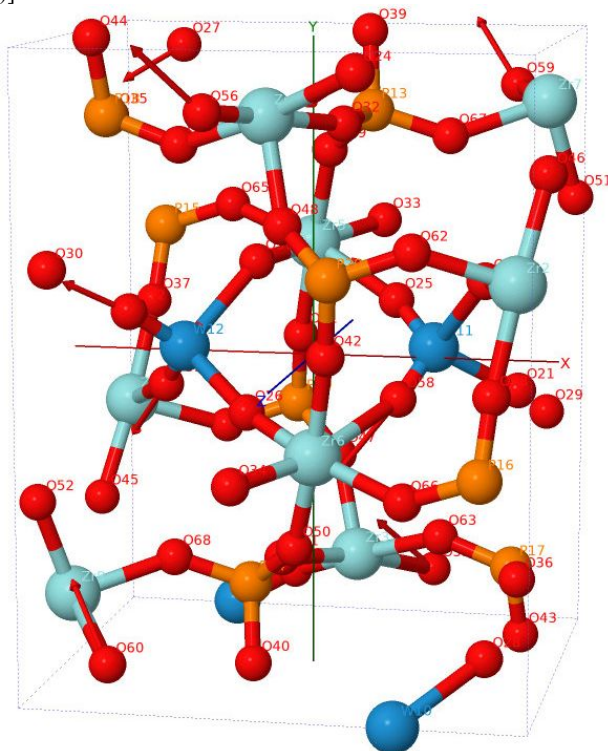

**Figure S1.** Graphical representations of the vibration vectors superimposed on the structure of  $\text{Zr}_2(\text{WO}_4)(\text{PO}_4)_2$  for strong- and medium-intensity IR-active bands.

## S1.2. Major Raman-Active Vibrational Modes

Raman mode at  $1034\text{ cm}^{-1}$  (s: strong) [ $A_g$ ;  $\nu_1(\text{WO}_4)+\text{P-O}$  stretching]:

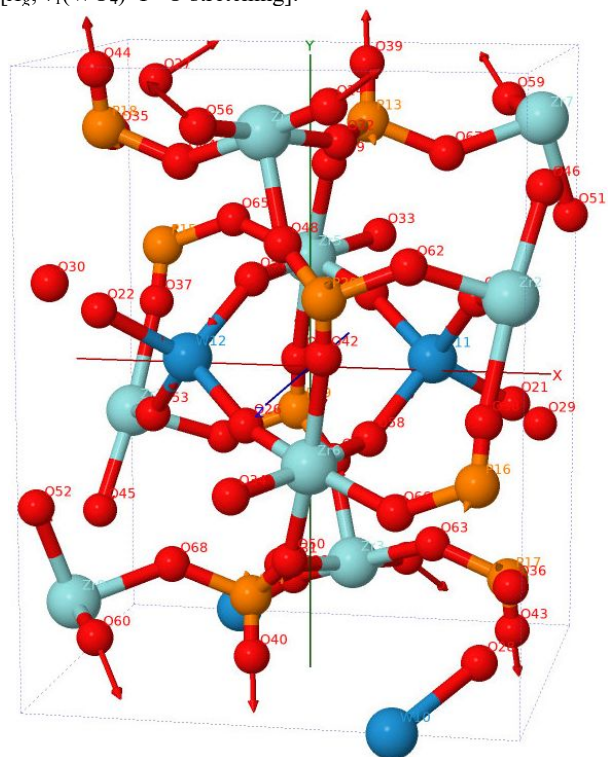

Raman mode at 1022  $\text{cm}^{-1}$  (*s*) [ $B_{3g}$ ;  $\nu_3(\text{PO}_4)$ ]: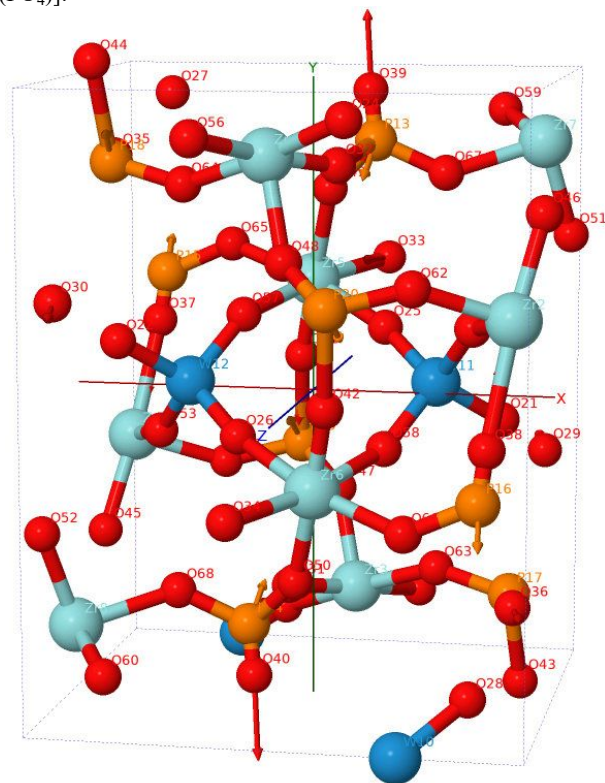

Raman mode at 1002  $\text{cm}^{-1}$  (s) [ $A_g$ ;  $\nu_3(\text{PO}_4)+\nu_1(\text{WO}_4)$ ]:

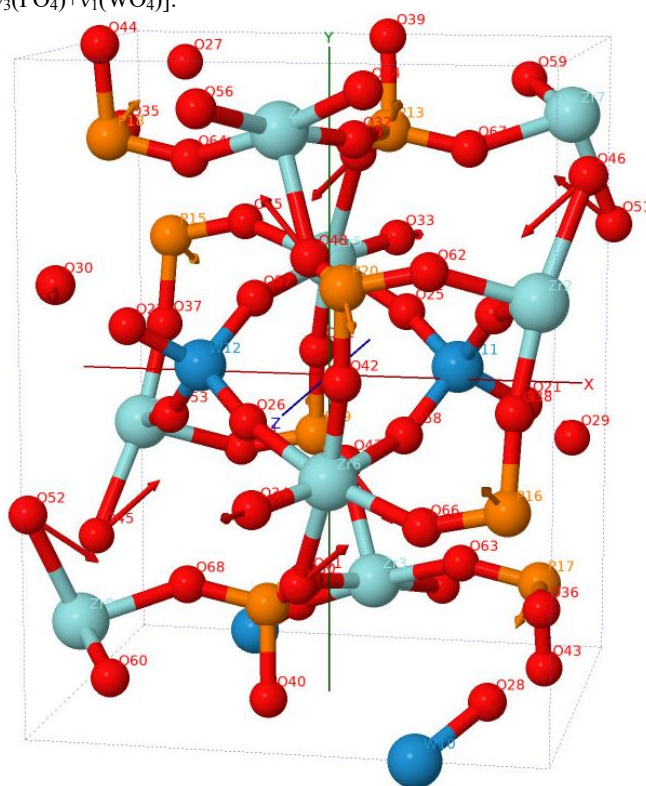



Raman mode at  $874\text{ cm}^{-1}$  ( $m$ : medium) [ $B_{3g}$ ;  $\nu_3(\text{WO}_4)$ ]:

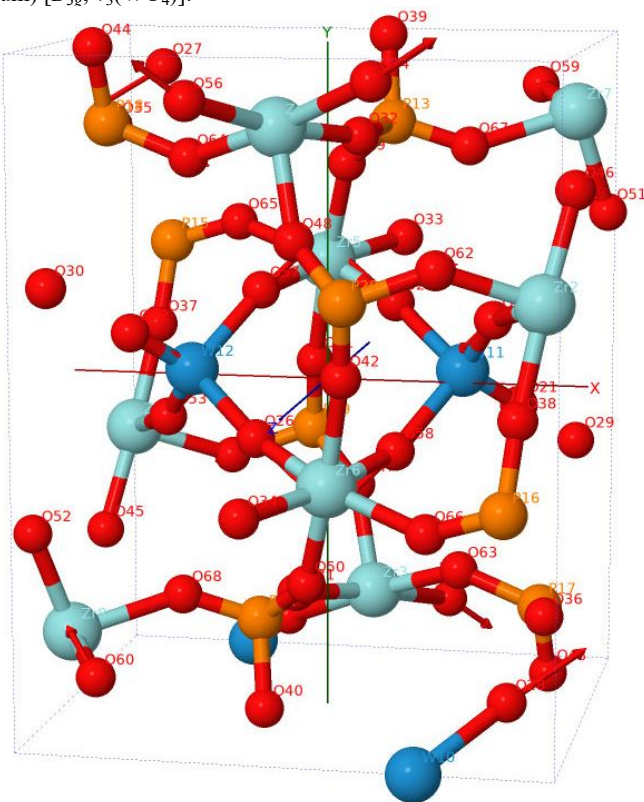

Raman mode at  $831\text{ cm}^{-1}$  ( $s$ ) [ $B_{2g}$ ;  $\nu_3(\text{WO}_4)$ ]:

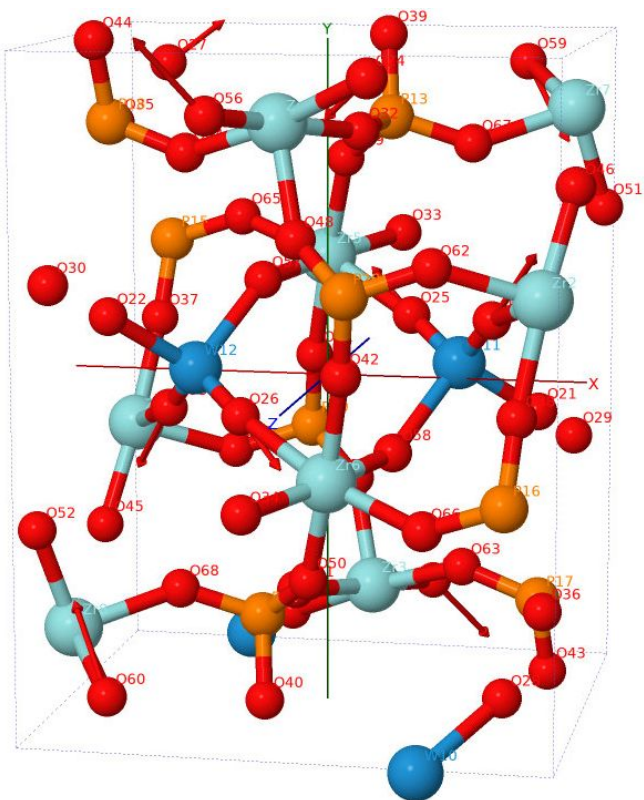

**Figure S2.** Graphical representations of the vibration vectors superimposed on the structure of  $\text{Zr}_2(\text{WO}_4)(\text{PO}_4)_2$  for strong- and medium-intensity Raman-active bands.
